# Supplementary material for: Application of a multi-way method to study long-term stability in ICP-AES
Source: Royal Society of Chemistry journal article supplement (doi:10.1039/b008759i), 2001-01-01
Supplement: corr-mat.doc [file corr-mat.doc]

# CORR-MAT.DOC

## Correlation Matrices of data sets obtained

## at different instrumental conditions

| Correlation matrix of data set obtained at Centre Conditions (A)  RF Power 1250 W & Nebuliser Gas Flow Rate 0.9 Lmin-1 |
| --- |

| Correlation matrix of data set obtained at Experiment 1 Conditions  RF Power 1125 W & Nebuliser Gas Flow Rate 1.05 Lmin-1 |
| --- |

| Correlation matrix of data set obtained at Experiment 2 Conditions  RF Power 1125 W & Nebuliser Gas Flow Rate 0.75 Lmin-1 |
| --- |

| Correlation matrix of data set obtained at Experiment 3 Conditions  RF Power 1375 W & Nebuliser Gas Flow Rate 1.05 Lmin-1 |
| --- |

| Correlation matrix of data set obtained at Experiment 4 Conditions  RF Power 1375 W & Nebuliser Gas Flow Rate 0.75 Lmin-1 |
| --- |

| Correlation matrix of data set obtained at Experiment 5 Conditions  RF Power 1000 W & Nebuliser Gas Flow Rate 0.9 Lmin-1 |
| --- |

| Correlation matrix of data set obtained at Experiment 6 Conditions  RF Power 1250 W & Nebuliser Gas Flow Rate 1.2 Lmin-1 |
| --- |

| Correlation matrix of data set obtained at Experiment 7 Conditions  RF Power 1250 W & Nebuliser Gas Flow Rate 0.6 Lmin-1 |
| --- |

| Correlation matrix of data set obtained at Experiment 8 Conditions  RF Power 1500 W & Nebuliser Gas Flow Rate 0.9 Lmin-1 |
| --- |

| Correlation matrix of data set obtained at Experiment 9 Conditions  RF Power 1000 W & Nebuliser Gas Flow Rate 1.2 Lmin-1 |
| --- |

| Correlation matrix of data set obtained at Experiment 11 Conditions  RF Power 1500 W & Nebuliser Gas Flow Rate 1.2 Lmin-1 |
| --- |

| Correlation matrix of data set obtained at Experiment 12 Conditions  RF Power 1500 W & Nebuliser Gas Flow Rate 0.6 Lmin-1 |
| --- |
