# Supplementary material for: Application of a multi-way method to study long-term stability in ICP-AES
Source: Royal Society of Chemistry journal article supplement (doi:10.1039/b008759i), 2001-01-01
Supplement: plots.doc [file plots.doc]

# PLOTS.DOC

## Drift Plots at different instrumental conditions

CENTRAL CONDITIONS (A) DRIFT PLOT

|  |
| --- |

EXPERIMENT 1 DRIFT PLOT

|  |
| --- |

EXPERIMENT 2 DRIFT PLOT

|  |
| --- |

EXPERIMENT 3 DRIFT PLOT

|  |
| --- |

EXPERIMENT 4 DRIFT PLOT

|  |
| --- |

EXPERIMENT 5 DRIFT PLOT

|  |
| --- |

EXPERIMENT 6 DRIFT PLOT

|  |
| --- |

EXPERIMENT 7 DRIFT PLOT

|  |
| --- |

EXPERIMENT 8 DRIFT PLOT

|  |
| --- |

EXPERIMENT 9 DRIFT PLOT

|  |
| --- |

EXPERIMENT 11 DRIFT PLOT

|  |
| --- |

EXPERIMENT 12 DRIFT PLOT

|  |
| --- |
